# Supplementary material for: Polyfunctional anti-human epidermal growth factor receptor 3 (anti-HER3) antibodies induced by HER3 vaccines have multiple mechanisms of antitumor activity against therapy resistant and triple negative breast cancers
Source: Springer Nature journal article supplement (doi:10.1186/s13058-018-1023-x), 2018-08-09

**anti-HER3 mAb  
vs.  
Control IgG**

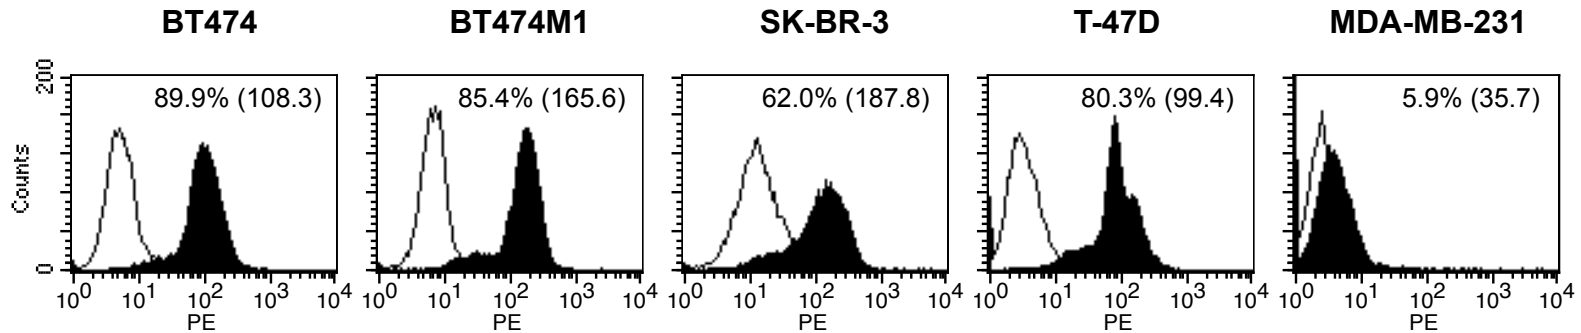

**HER3-VIA  
vs.  
GFP-VIA**

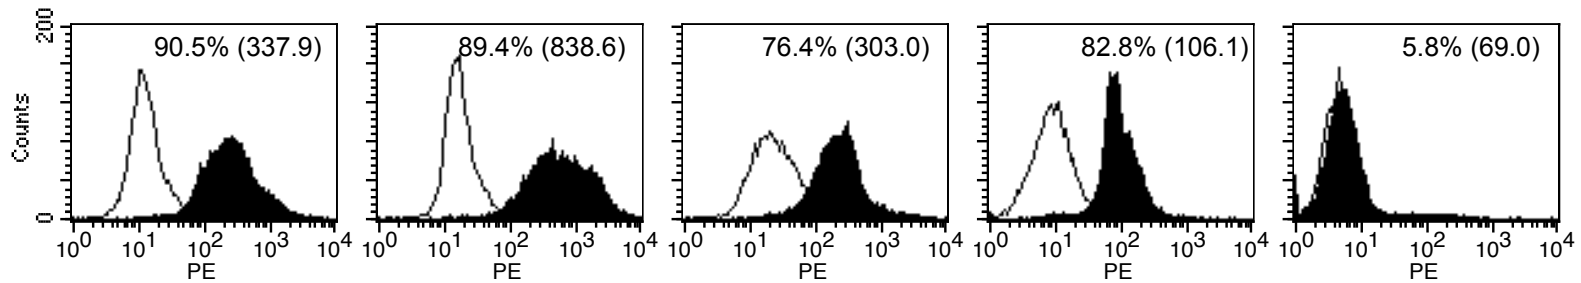

Supplement: MOESM1 [file 16023968]
